# Supplementary material for: Stochastic Expression of Invasion Genes in Plasmodium falciparum Schizonts
Source: Research Square preprint supplement (doi:10.21203/rs.3.rs-152167/v1), 2021-02-02
Supplement: Supplementary file 2 [file 26b6d2b3e536cc3453d359db.xlsx]

## Sheet: Sheet1
Primer ID	Sequence	Desc
PF3D7_1035400_FP1	GCATGTACAGCTGCTTCAAAGG	merozoite surface protein 3
PF3D7_1035400_RP1	AACGCCTCCTCCAAATTCCC
PF3D7_1335100_FP1	TGAAAATGTTGATGATGACGCAGT	merozoite surface protein 7
PF3D7_1335100_RP1	TGTCGATTCTCCTCCTTGTGC
PF3D7_1222700_FP1	TCTACTGAAGCCACTGGTGC	glideosome-associated protein 45
PF3D7_1222700_RP1	ACGTTCACCAAGATCACATCCA
PF3D7_1116000_FP1	ACCCCCTCAAACACATCACG	rhoptry neck protein 4
PF3D7_1116000_RP1	TGCATCATCGGATCCTTCGC
PF3D7_0424100_FP1	TGGAAAGTGTATAGCTGTAGATGC	reticulocyte binding protein homologue 5
PF3D7_0424100_RP1	ACCTCTTCGGTTTCATCATCTGT
PF3D7_0320900_FP_1	AGGTTCCACAGCAGCAGTTTAC	Histone 2A.z
PF3D7_0320900_RP_1	GTGGGATAACACCACCACCAG
PF3D7_1108600_FP_1	CCTGCTCATGAAAGTGGAGCA	PfERC
PF3D7_1108600_RP_1 TGCTCTACTACGAGCTGTTGG
PF3D7_0628300_FP_1	GCTGGGTTCCCAAAATCTTTGA	CEPT, putative
PF3D7_0628300_RP1	TTTGGAATACGCCTGCTCCTTT
PF3D7_1471100 _FP_1	ACAAGTGCCTTAACCACCGTTA	EXP2
PF3D7_1471100 _RP1	ACCCACCACATACGTGACCAT
PF3D7_0929400_FP_1	TAAGGACTGCAACGTCAACCAA	RhopH2
PF3D7_0929400_RP_1	GGCAACTTGTGTTTCCAAAAATG
