# Supplementary material for: Stochastic Expression of Invasion Genes in Plasmodium falciparum Schizonts
Source: Research Square preprint supplement (doi:10.21203/rs.3.rs-152167/v1), 2021-02-02
Supplement: Supplementary file 4 [file 6f58697a2e12b39fabf3a0ba.xlsx]

## Sheet: Sheet1
geneid	Description
PF3D7_0929400	high molecular weight rhoptry protein 2
PF3D7_0501600	rhoptry-associated protein 2
PF3D7_0210600	rhoptry apical surface protein RASP2
PF3D7_1410400	rhoptry-associated protein 1
PF3D7_0410000	erythrocyte vesicle protein 1
PF3D7_1003600	membrane skeletal protein IMC1-related
PF3D7_0905400	high molecular weight rhoptry protein 3
PF3D7_0501500	rhoptry-associated protein 3
PF3D7_1105100	histone H2B
PF3D7_1027300	peroxiredoxin
PF3D7_1038000	antigen UB05
PF3D7_1038000.2	antigen UB05
PF3D7_1035400	merozoite surface protein 3
PF3D7_1246200	actin I
PF3D7_1371300	28S ribosomal RNA
PF3D7_1014100	merozoite surface protein MSA180
PF3D7_0903600	conserved Plasmodium protein, unknown function
PF3D7_0217500	calcium-dependent protein kinase 1
PF3D7_0722200	rhoptry-associated leucine zipper-like protein 1
PF3D7_1035200	S-antigen
PF3D7_1335300	reticulocyte binding protein 2 homologue b
PF3D7_0617800	histone H2A
PF3D7_1246400	myosin light chain 1 | myosin A tail domain interacting protein
PF3D7_0930300	merozoite surface protein 1
PF3D7_1471100	exported protein 2
PF3D7_1026600	conserved Plasmodium protein, unknown function
PF3D7_1125800	kelch protein, putative
PF3D7_0420300	transcription factor with AP2 domain(s)
PF3D7_1351700	alveolin, putative
PF3D7_1455100	protein phosphatase, putative
PF3D7_0801100	28S ribosomal RNA
PF3D7_1244600	ADP-ribosylation factor GTPase-activating protein, putative
PF3D7_1237900	conserved Plasmodium protein, unknown function
PF3D7_0512600	ras-related protein Rab-1B
PF3D7_1328100	proteasome subunit beta type 7 precursor, putative
PF3D7_1406700	phosphatase, putative
PF3D7_0617300	conserved Plasmodium protein, unknown function
PF3D7_1149200	ring-infected erythrocyte surface antigen
PF3D7_1224300	polyadenylate-binding protein, putative
PF3D7_1238800	acyl-CoA synthetase
PF3D7_0102200	ring-infected erythrocyte surface antigen
PF3D7_0723800	conserved Plasmodium protein, unknown function
PF3D7_1247300	GPI mannosyltransferase 2, putative
PF3D7_0207000	merozoite surface protein 4
PF3D7_0313100	ubiquitin-protein ligase, putative
