# Supplementary material for: Stochastic Expression of Invasion Genes in Plasmodium falciparum Schizonts
Source: Research Square preprint supplement (doi:10.21203/rs.3.rs-152167/v1), 2021-02-02
Supplement: Supplementary file 5 [file 8c9c4da04aac2484386864d6.xlsx]

## Sheet: Sheet1
GeneID	Gene Product
PF3D7_0421300	erythrocyte membrane protein 1, PfEMP1
PF3D7_0113600	surface-associated interspersed protein 1.2 (SURFIN 1.2), pseudogene
PF3D7_1100100	erythrocyte membrane protein 1, PfEMP1
PF3D7_0100100	erythrocyte membrane protein 1, PfEMP1
PF3D7_0700100	erythrocyte membrane protein 1, PfEMP1
PF3D7_0425800	erythrocyte membrane protein 1, PfEMP1
PF3D7_0800300	erythrocyte membrane protein 1, PfEMP1
PF3D7_0900100	erythrocyte membrane protein 1, PfEMP1
PF3D7_0413400	erythrocyte membrane protein 1 (PfEMP1), exon 1, pseudogene
PF3D7_0421100	erythrocyte membrane protein 1, PfEMP1
PF3D7_0937700	rifin
PF3D7_0400300	rifin
PF3D7_1373500	erythrocyte membrane protein 1, PfEMP1 (VAR)
PF3D7_0828600	folate transporter 1
PF3D7_1467600	conserved Plasmodium protein, unknown function
PF3D7_0616500	TRAP-like protein
PF3D7_1115800	conserved Plasmodium protein, unknown function
PF3D7_1455100	protein tyrosine phosphatase, putative
PF3D7_1016000	conserved Plasmodium protein, unknown function
PF3D7_1338400	SprT-like domain-containing protein, putative
PF3D7_1136200	conserved Plasmodium protein, unknown function
PF3D7_1301700	Plasmodium exported protein (hyp8), unknown function
PF3D7_1455300	conserved Plasmodium protein, unknown function
PF3D7_1410400	rhoptry-associated protein 1
PF3D7_0830600	Plasmodium exported protein (PHISTc), unknown function
PF3D7_1464600	serine/threonine protein phosphatase UIS2, putative
PF3D7_0802000	glutamate dehydrogenase, putative
PF3D7_0322600	conserved Plasmodium protein, unknown function
PF3D7_0501500	rhoptry-associated protein 3
PF3D7_1404900	conserved Plasmodium protein, unknown function
PF3D7_0530200	phosphoenolpyruvate/phosphate translocator
PF3D7_0515200	conserved Plasmodium protein, unknown function
PF3D7_1401400	early transcribed membrane protein 14.1
PF3D7_1309100	60S ribosomal protein L24, putative
PF3D7_1030200	claudin-like apicomplexan microneme protein, putative
PF3D7_0206800	merozoite surface protein 2
PF3D7_0928400	conserved Plasmodium membrane protein, unknown function
PF3D7_0708500	heat shock protein 86 family protein
PF3D7_1472100	protein transport protein YIP1, putative
PF3D7_1347000	WD repeat-containing protein 92, putative
PF3D7_0420300	transcription factor with AP2 domain(s)
PF3D7_1335100	merozoite surface protein 7
PF3D7_0214700	conserved Plasmodium protein, unknown function
PF3D7_0617900	histone H3 variant
PF3D7_1223100	cAMP-dependent protein kinase regulatory subunit
PF3D7_1245500	conserved Plasmodium protein, unknown function
PF3D7_1123100	calcium-dependent protein kinase 7
PF3D7_0113900	Plasmodium exported protein (hyp8), unknown function
PF3D7_0501800	chromosome assembly factor 1
PF3D7_0905400	high molecular weight rhoptry protein 3
PF3D7_1411600	GTP-binding protein, putative
PF3D7_1246200	actin I
PF3D7_0914200	phospholipid or glycerol acyltransferase, putative
PF3D7_1035400	merozoite surface protein 3
PF3D7_1437200	ribonucleoside-diphosphate reductase large subunit, putative
PF3D7_0506200	TATA-box-binding protein
PF3D7_1211400	heat shock protein DNAJ homologue Pfj4
PF3D7_1131900	conserved Plasmodium protein, unknown function
PF3D7_1132800	aquaglyceroporin
PF3D7_0605900	long chain polyunsaturated fatty acid elongation enzyme, putative
PF3D7_0513600	deoxyribodipyrimidine photo-lyase, putative
PF3D7_0529000	conserved Plasmodium protein, unknown function
PF3D7_0628300	choline/ethanolaminephosphotransferase, putative
PF3D7_1410600	eukaryotic translation initiation factor 2 subunit gamma, putative
PF3D7_1132200	T-complex protein 1 subunit alpha
PF3D7_0929400	high molecular weight rhoptry protein 2
PF3D7_1143800	conserved Plasmodium protein, unknown function
PF3D7_1130400	26S protease regulatory subunit 6A, putative
PF3D7_1307900	tripartite motif protein, putative
PF3D7_1302000	EMP1-trafficking protein
PF3D7_0730200	AP-4 complex subunit beta, putative
PF3D7_0503400	actin-depolymerizing factor 1
PF3D7_1471100	exported protein 2
PF3D7_0930300	merozoite surface protein 1
PF3D7_1108600	endoplasmic reticulum-resident calcium binding protein
PF3D7_1020900	ADP-ribosylation factor
PF3D7_1352500	thioredoxin-related protein, putative
PF3D7_1237700	conserved protein, unknown function
PF3D7_1105100	histone H2B (H2B)
PF3D7_0918500	telomerase RNA
PF3D7_0923800.2	thioredoxin reductase
PF3D7_0923800	thioredoxin reductase
PF3D7_1149100	Plasmodium exported protein, unknown function
PF3D7_1149100.2	Plasmodium exported protein, unknown function
PF3D7_0420900	erythrocyte membrane protein 1, PfEMP1
PF3D7_0937400	rifin
PF3D7_0114700	rifin
PF3D7_0201000	rifin
