# Supplementary material for: Stochastic Expression of Invasion Genes in Plasmodium falciparum Schizonts
Source: Research Square preprint supplement (doi:10.21203/rs.3.rs-152167/v1), 2021-02-02
Supplement: Supplementary file 6 [file 152e184b3438f5432a3d1598.xlsx]

## Sheet: Sheet1
Group	PathwayName		Annotated	Drawn	Anno_inPathway	InputPathway	Direction of deviation from expected	Hypergeometric_P	Binomial_P	GeneList
1	MPM-MPMP1202-Phosphoproteome		3709	329	1222	179	over	0	1.0132e-15	PF3D7_0818200,PF3D7_1251200,PF3D7_0503400,PF3D7_0934800,PF3D7_1020900,PF3D7_0509800,PF3D7_1131800,PF3D7_1342000,PF3D7_1123900,PF3D7_0323500,PF3D7_1146600,PF3D7_1238900,PF3D7_1033900,PF3D7_1225800,PF3D7_0525800,PF3D7_0515700,PF3D7_1222700,PF3D7_0512600,PF3D7_1455500,PF3D7_1311400,PF3D7_1440700,PF3D7_1230700,PF3D7_0606700,PF3D7_1145100,PF3D7_1438900,PF3D7_1246400,PF3D7_1423300,PF3D7_1003600,PF3D7_1…
1	MPM-MPMP1206-Phosphoproteome - Treeck et al 2011		3709	329	946	146	over	1.77636e-15	9.65889e-14	PF3D7_0818200,PF3D7_1251200,PF3D7_0503400,PF3D7_0934800,PF3D7_1020900,PF3D7_0509800,PF3D7_1131800,PF3D7_1342000,PF3D7_0323500,PF3D7_1146600,PF3D7_1238900,PF3D7_1033900,PF3D7_1225800,PF3D7_0525800,PF3D7_0515700,PF3D7_1222700,PF3D7_0512600,PF3D7_1455500,PF3D7_1311400,PF3D7_1440700,PF3D7_1230700,PF3D7_0606700,PF3D7_1145100,PF3D7_1438900,PF3D7_1246400,PF3D7_1423300,PF3D7_1003600,PF3D7_1422500,PF3D7_1…
1	MPM-MPMP1135-Lysine acetylated proteins		3709	329	762	110	over	3.092e-09	3.49183e-08	PF3D7_0818200,PF3D7_1342000,PF3D7_0617900,PF3D7_0629700,PF3D7_0530900,PF3D7_1337800,PF3D7_0608800,PF3D7_0407900,PF3D7_1141800,PF3D7_0414900,PF3D7_0419600,PF3D7_1342600,PF3D7_1222300,PF3D7_0624600,PF3D7_1219100,PF3D7_1361100,PF3D7_1429800,PF3D7_1462800,PF3D7_0423500,PF3D7_1351700,PF3D7_1010700,PF3D7_0904800,PF3D7_1138500,PF3D7_0202500,PF3D7_0506900,PF3D7_0919900,PF3D7_1424400,PF3D7_0802100,PF3D7_1…
1	MPM-MPMP1203-Phosphoproteome - Collins et al 2014		3709	329	709	112	over	4.68225e-12	1.20406e-10	PF3D7_0818200,PF3D7_1251200,PF3D7_0934800,PF3D7_1020900,PF3D7_0509800,PF3D7_1131800,PF3D7_1342000,PF3D7_1123900,PF3D7_1146600,PF3D7_1033900,PF3D7_1225800,PF3D7_0525800,PF3D7_0515700,PF3D7_1222700,PF3D7_0512600,PF3D7_1230700,PF3D7_0606700,PF3D7_1145100,PF3D7_1246400,PF3D7_1003600,PF3D7_1456000,PF3D7_1008000,PF3D7_1426700,PF3D7_0310400,PF3D7_0423700,PF3D7_0627300,PF3D7_0316900,PF3D7_1466100,PF3D7_1…
1	MPM-MPMP1205-Phosphoproteome - Pease et al 2013		3709	329	662	111	over	8.19345e-14	3.63089e-12	PF3D7_0818200,PF3D7_1251200,PF3D7_1131800,PF3D7_1342000,PF3D7_1225800,PF3D7_0525800,PF3D7_0515700,PF3D7_1222700,PF3D7_0512600,PF3D7_1455500,PF3D7_1311400,PF3D7_1440700,PF3D7_1230700,PF3D7_0606700,PF3D7_1145100,PF3D7_1423300,PF3D7_1003600,PF3D7_1456000,PF3D7_1008000,PF3D7_1426700,PF3D7_0423700,PF3D7_1001600,PF3D7_0316900,PF3D7_1466100,PF3D7_0823800,PF3D7_0926400,PF3D7_1136900,PF3D7_1346300,PF3D7_0…
1	MPM-MPMP1204-Phosphoproteome - Lasonder et al 2011		3709	329	570	101	over	4.04121e-14	2.18535e-12	PF3D7_0818200,PF3D7_1251200,PF3D7_0934800,PF3D7_0509800,PF3D7_1146600,PF3D7_1238900,PF3D7_0525800,PF3D7_0515700,PF3D7_1222700,PF3D7_1311400,PF3D7_1440700,PF3D7_1230700,PF3D7_0606700,PF3D7_1145100,PF3D7_1003600,PF3D7_1008000,PF3D7_1426700,PF3D7_1401400,PF3D7_0206900,PF3D7_1001600,PF3D7_1466100,PF3D7_1204300,PF3D7_1471100,PF3D7_0823800,PF3D7_0926400,PF3D7_1136900,PF3D7_1346300,PF3D7_0418600,PF3D7_0…
1	MPM-MPMP1176-Nuclear proteome		3709	329	527	66	over	0.000855552	0.00227123	PF3D7_0818200,PF3D7_1251200,PF3D7_0503400,PF3D7_0934800,PF3D7_1342000,PF3D7_1123900,PF3D7_0323500,PF3D7_1146600,PF3D7_1455500,PF3D7_0606700,PF3D7_1145100,PF3D7_1423300,PF3D7_1368100,PF3D7_1456000,PF3D7_1008000,PF3D7_1426700,PF3D7_0926900,PF3D7_1353900,PF3D7_1204300,PF3D7_0413600,PF3D7_1127600,PF3D7_0617900,PF3D7_0629700,PF3D7_1141800,PF3D7_0624600,PF3D7_1219100,PF3D7_1351700,PF3D7_0904800,PF3D7_1…
1	MPM-MPMP1207-Phosphoproteome of the merozoite		3709	329	481	92	over	5.66214e-15	4.5459e-13	PF3D7_0818200,PF3D7_1251200,PF3D7_0934800,PF3D7_0509800,PF3D7_1131800,PF3D7_1342000,PF3D7_1123900,PF3D7_1033900,PF3D7_1225800,PF3D7_0525800,PF3D7_1222700,PF3D7_1311400,PF3D7_1438900,PF3D7_1246400,PF3D7_1003600,PF3D7_1008000,PF3D7_1401400,PF3D7_0627300,PF3D7_1466100,PF3D7_1204300,PF3D7_0926400,PF3D7_1346300,PF3D7_1127600,PF3D7_0418600,PF3D7_0617900,PF3D7_0629700,PF3D7_0530900,PF3D7_1337800,PF3D7_0…
1	MPM-MPMP1309-Total palmitome of Plasmodium falciparum		3709	329	364	74	over	1.74749e-13	1.1038e-11	PF3D7_0818200,PF3D7_0503400,PF3D7_1020900,PF3D7_1225800,PF3D7_1115600,PF3D7_0525800,PF3D7_0515700,PF3D7_1222700,PF3D7_1438900,PF3D7_0802200,PF3D7_1246400,PF3D7_1003600,PF3D7_1405600,PF3D7_0113900,PF3D7_0316900,PF3D7_1134100,PF3D7_1353900,PF3D7_1204300,PF3D7_1471100,PF3D7_0823800,PF3D7_0816200,PF3D7_0831600,PF3D7_0617900,PF3D7_0608800,PF3D7_1222300,PF3D7_1462800,PF3D7_0904800,PF3D7_0506900,PF3D7_0…
1	MPM-MPMP1301-The phosphoproteome of Plasmodium falciparum infected RBCs		3709	329	334	52	over	9.83695e-06	5.31675e-05	PF3D7_0818200,PF3D7_0934800,PF3D7_1146600,PF3D7_0606700,PF3D7_1145100,PF3D7_1423300,PF3D7_1426700,PF3D7_1001600,PF3D7_0316900,PF3D7_1204300,PF3D7_1471100,PF3D7_0823800,PF3D7_0926400,PF3D7_1346300,PF3D7_0629700,PF3D7_0419600,PF3D7_0624600,PF3D7_1219100,PF3D7_1361100,PF3D7_1429800,PF3D7_0904800,PF3D7_1138500,PF3D7_0506900,PF3D7_0802100,PF3D7_1018200,PF3D7_0219600,PF3D7_1433500,PF3D7_0102200,PF3D7_1…
1	MPM-MPMP1273-S-Glutathionylated proteins		3709	329	320	67	over	6.62581e-13	3.84145e-11	PF3D7_0818200,PF3D7_0503400,PF3D7_0934800,PF3D7_1020900,PF3D7_1123900,PF3D7_1225800,PF3D7_1115600,PF3D7_0512600,PF3D7_1438900,PF3D7_0802200,PF3D7_1405600,PF3D7_1134100,PF3D7_1353900,PF3D7_1204300,PF3D7_1471100,PF3D7_0608800,PF3D7_0419600,PF3D7_1222300,PF3D7_1462800,PF3D7_0904800,PF3D7_1138500,PF3D7_0520900,PF3D7_0623000,PF3D7_1320600,PF3D7_1108600,PF3D7_1018200,PF3D7_1235600,PF3D7_0102200,PF3D7_0…
1	MPM-MPMP1279-S-nitrosylated proteins		3709	329	263	51	over	8.35154e-09	1.3778e-07	PF3D7_0818200,PF3D7_1115600,PF3D7_1438900,PF3D7_0802200,PF3D7_1368100,PF3D7_1353900,PF3D7_1204300,PF3D7_0413600,PF3D7_1346300,PF3D7_0608800,PF3D7_0419600,PF3D7_1222300,PF3D7_0624600,PF3D7_1462800,PF3D7_1010700,PF3D7_0904800,PF3D7_1138500,PF3D7_0520900,PF3D7_1108600,PF3D7_1235600,PF3D7_0525100,PF3D7_1034900,PF3D7_0220000,PF3D7_1443900,PF3D7_1118300,PF3D7_1344200,PF3D7_0905400,PF3D7_0207600,PF3D7_0…
Group	PathwayName		Annotated	Drawn	Anno_inPathway	InputPathway	Direction of deviation from expected	Hypergeometric_P	Binomial_P	GeneList
1	MPM-MPMP1186-Parasite invasion ligands and human erythrocyte receptors	Invasion	3709	329	10	7	over	1.35863e-07	3.77592e-05	PF3D7_1335300,PF3D7_0731500,PF3D7_0424200,PF3D7_1371600,PF3D7_1028700,PF3D7_1335400,PF3D7_0424100
1	MPM-MPMP1066-Domains of merozoite surface proteins	Invasion	3709	329	14	6	over	8.0511e-05	0.00172928	PF3D7_1335300,PF3D7_0731500,PF3D7_1133400,PF3D7_0424200,PF3D7_1335400,PF3D7_1218000
1	MPM-MPMP1145-Merozoite ligands their erythrocyte receptors	Invasion	3709	329	19	9	over	1.17972e-06	6.24455e-05	PF3D7_1335300,PF3D7_0731500,PF3D7_1133400,PF3D7_0424200,PF3D7_1371600,PF3D7_1028700,PF3D7_1335400,PF3D7_1035500,PF3D7_0424100
1	MPM-MPMP1152-Model for merozoite invasion	Invasion	3709	329	8	3	over	0.00319003	0.0351505	PF3D7_1133400,PF3D7_0424200,PF3D7_0424100
1	MPM-MPMP1168-MSPDBL and MSP1 mediate merozoite invasion	Invasion	3709	329	10	6	over	3.85736e-06	0.000307951	PF3D7_1133400,PF3D7_1228600,PF3D7_1035700,PF3D7_0905400,PF3D7_1035500,PF3D7_0818600
1	MPM-MPMP1053-Components of the linear motor responsible for merozoite motility in invasion	Invasion	3709	329	41	15	over	1.35369e-07	5.53853e-06	PF3D7_0525800,PF3D7_0515700,PF3D7_1222700,PF3D7_1246400,PF3D7_1460600,PF3D7_1423300,PF3D7_1003600,PF3D7_1406800,PF3D7_0522600,PF3D7_0530900,PF3D7_1342600,PF3D7_0423500,PF3D7_1351700,PF3D7_0506900,PF3D7_0918000
1	MPM-MPMP1290-Subcellular localization of proteins involved in invasion	Invasion	3709	329	85	34	over	4.44089e-16	5.21889e-13	PF3D7_1335300,PF3D7_0731500,PF3D7_0206900,PF3D7_1036000,PF3D7_0212600,PF3D7_0316000,PF3D7_0828800,PF3D7_1136900,PF3D7_0402200,PF3D7_0831600,PF3D7_1133400,PF3D7_0424200,PF3D7_1320600,PF3D7_1228600,PF3D7_0424300,PF3D7_1035700,PF3D7_0935800,PF3D7_1035400,PF3D7_1035300,PF3D7_1252400,PF3D7_0905400,PF3D7_0207600,PF3D7_0929400,PF3D7_1410400,PF3D7_0207700,PF3D7_1335400,PF3D7_1035500,PF3D7_0424100,PF3D7_1…
1	MPM-MPMP1083-Functional annotation of merozoite invasion-related proteins	Invasion	3709	329	84	36	over	0	1.37552e-14	PF3D7_1335300,PF3D7_0731500,PF3D7_0206900,PF3D7_1036000,PF3D7_0212600,PF3D7_0316000,PF3D7_1334600,PF3D7_0828800,PF3D7_1136900,PF3D7_0831600,PF3D7_1133400,PF3D7_0424200,PF3D7_1320600,PF3D7_1228600,PF3D7_0730800,PF3D7_0424300,PF3D7_1035700,PF3D7_0935800,PF3D7_1028700,PF3D7_1035400,PF3D7_1035300,PF3D7_1252400,PF3D7_0905400,PF3D7_0207600,PF3D7_0929400,PF3D7_1410400,PF3D7_0207700,PF3D7_1335400,PF3D7_1…
1	MPM-MPMP1130-Localization and function of some Hsp40s and Hsp70s	Exported Proteins	3709	329	21	6	over	0.00157792	0.0118474	PF3D7_0102200,PF3D7_1028700,PF3D7_1344200,PF3D7_0917900,PF3D7_0501100,PF3D7_1149200
1	MPM-MPMP1075-Established and putative Maurer-s clefts proteins	Exported Proteins	3709	329	144	22	over	0.00350148	0.0102872	PF3D7_0818200,PF3D7_1401400,PF3D7_0310400,PF3D7_0423700,PF3D7_1471100,PF3D7_1222300,PF3D7_1462800,PF3D7_0202500,PF3D7_1228600,PF3D7_0102200,PF3D7_0935800,PF3D7_1121600,PF3D7_0905400,PF3D7_0207600,PF3D7_0929400,PF3D7_0424600,PF3D7_0917900,PF3D7_1343000,PF3D7_1102800,PF3D7_0501100,PF3D7_0302500,PF3D7_0501500
1	MPM-MPMP1292-Subcellular location of exported proteins	Exported Proteins	3709	329	45	7	over	0.0415062	0.108531	PF3D7_1016800,PF3D7_0410000,PF3D7_1471100,PF3D7_0102200,PF3D7_1116800,PF3D7_1436300,PF3D7_0501100
1	MPM-MPMP1185-Parasite encoded proteins associated with the membrane of infected erythrocytes	Egress and Invasion, Exported Proteins	3709	329	49	16	over	4.03617e-07	1.09946e-05	PF3D7_0310400,PF3D7_0113900,PF3D7_1471100,PF3D7_1346300,PF3D7_0506900,PF3D7_1424400,PF3D7_0830500,PF3D7_1119400,PF3D7_0507100,PF3D7_0207600,PF3D7_0424600,PF3D7_1436300,PF3D7_0917900,PF3D7_0501100,PF3D7_0413700,PF3D7_1252100
1	MPM-MPMP1041-Characteristics of Plasmodium falciparum export proteins that remodel infected erythrocyte	PVM exported proteins	3709	329	42	9	over	0.00293866	0.0137259	PF3D7_0423700,PF3D7_1471100,PF3D7_0202500,PF3D7_0102200,PF3D7_1116800,PF3D7_1121600,PF3D7_0424600,PF3D7_1436300,PF3D7_0402100
1	MPM-MPMP1236-Proteins of the parasitophorous vacuolar membrane	PVM exported proteins	3709	329	15	7	over	1.30264e-05	0.000443546	PF3D7_0423700,PF3D7_1471100,PF3D7_0202500,PF3D7_1116800,PF3D7_1121600,PF3D7_0929400,PF3D7_1436300
1	MPM-MPMP1242-Proteome of the parasitophorous vacuole	PVM exported proteins	3709	329	41	12	over	2.96169e-05	0.000366449	PF3D7_0423700,PF3D7_1471100,PF3D7_1222300,PF3D7_1462800,PF3D7_0202500,PF3D7_1035400,PF3D7_1116800,PF3D7_1121600,PF3D7_0207600,PF3D7_0929400,PF3D7_1436300,PF3D7_1115400
1	MPM-MPMP1118-Inositol Phosphate metabolism	phosphatidylinositol signaling	3709	329	23	6	over	0.00284791	0.0177062	PF3D7_0509800,PF3D7_0104200,PF3D7_1315600,PF3D7_1127600,PF3D7_0705500,PF3D7_0511800
1	MPM-MPMP1201-Phosphoinositides and membrane traffic	phosphatidylinositol signaling	3709	329	22	4	over	0.0397731	0.133677	PF3D7_0509800,PF3D7_1131800,PF3D7_1460100,PF3D7_0705500
1	MPM-MPMP1197-Phosphatidylcholine metabolism	phosphatidylinositol signaling	3709	329	19	4	over	0.0218609	0.0905117	PF3D7_0104200,PF3D7_1343000,PF3D7_0924000,PF3D7_0628300
1	MPM-MPMP1153-Model for metabolic compartmentalization of PI biosynthesis	PI biosynthesis	3709	329	11	3	over	0.0121312	0.0756194	PF3D7_1315600,PF3D7_0705500,PF3D7_0511800
1	MPM-MPMP1254-Rab proteins	Protein Trafficking	3709	329	13	3	over	0.0228045	0.110201	PF3D7_0512600,PF3D7_1320600,PF3D7_1340700
1	MPM-MPMP1146-Methionine and Polyamine metabolism		3709	329	21	4	over	0.033054	0.11846	PF3D7_0520900,PF3D7_1034900,PF3D7_1343000,PF3D7_0922200
1	MPM-MPMP1012-a-Linolenic acid -ALA- pathway	Glycerophospholipid metabolism.	3709	329	12	3	over	0.0169474	0.092231	PF3D7_0527000,PF3D7_1343000,PF3D7_0924000
1	MPM-MPMP1247-Pyridoxal phosphate -Vitamin B6- metabolism	Amino acid Meabolism	3709	329	23	4	over	0.0472637	0.149647	PF3D7_0608800,PF3D7_1235600,PF3D7_0413700,PF3D7_0927900
1	MPM-MPMP1084-General roles of deubiquitinases		3709	329	26	7	over	0.00132145	0.00922342	PF3D7_0627300,PF3D7_0316900,PF3D7_1119400,PF3D7_1117100,PF3D7_1365900,PF3D7_0104300,PF3D7_1211800
1	MPM-MPMP1296-The acidocalcisome	pH regulation	3709	329	35	6	over	0.0310602	0.0938602	PF3D7_0806800,PF3D7_1208400,PF3D7_1471200,PF3D7_0406100,PF3D7_0316300,PF3D7_1132800
1	MPM-MPMP1195-pH regulation in the parasite cytosol	pH regulation	3709	329	23	4	over	0.0472637	0.149647	PF3D7_0806800,PF3D7_1471200,PF3D7_0206200,PF3D7_0406100
1	MPM-MPMP1232-Proteins containing histone post translational modification-binding modules	Nucleosome Assembly	3709	329	26	6	over	0.00605765	0.0298026	PF3D7_0818200,PF3D7_0323500,PF3D7_0629700,PF3D7_1141800,PF3D7_1220900,PF3D7_1433400
1	MPM-MPMP1177-Nucleosome assembly and regulation	Nucleosome Assembly	3709	329	39	7	over	0.0188241	0.0612002	PF3D7_1020900,PF3D7_1123900,PF3D7_0617900,PF3D7_0624600,PF3D7_1220900,PF3D7_0604100,PF3D7_1105100
1	MPM-MPMP1006-Acetylation recognition by the bromodomain and other modules	Nucleosome Assembly	3709	329	12	3	over	0.0169474	0.092231	PF3D7_0818200,PF3D7_0617900,PF3D7_0629700
1	MPM-MPMP1011-ADP ribosylation factors functions in the secretory pathway	Protein Trafficking	3709	329	16	5	over	0.00172952	0.0147993	PF3D7_1020900,PF3D7_0509800,PF3D7_1131800,PF3D7_0205800,PF3D7_0924000
1	MPM-MPMP1121-Intracellular distribution of phosphoinositides and small GTPases involved in membrane traffic	Protein Trafficking	3709	329	9	4	over	0.000497636	0.00891402	PF3D7_1020900,PF3D7_0512600,PF3D7_1320600,PF3D7_1340700
1	MPM-MPMP1094-Genes coding for protein traffic related proteins	Protein Trafficking	3709	329	76	18	over	2.11061e-05	0.000193075	PF3D7_1020900,PF3D7_0512600,PF3D7_1455500,PF3D7_1311400,PF3D7_1440700,PF3D7_1230700,PF3D7_0606700,PF3D7_1145100,PF3D7_0210700,PF3D7_1219100,PF3D7_1361100,PF3D7_1429800,PF3D7_1320600,PF3D7_0917900,PF3D7_1314500,PF3D7_1104100,PF3D7_1340700,PF3D7_0216700
1	MPM-MPMP1046-Classical COPI-mediated vesicular transport	Protein Trafficking	3709	329	31	6	over	0.0164833	0.0600274	PF3D7_1020900,PF3D7_0606700,PF3D7_1145100,PF3D7_1429800,PF3D7_1314500,PF3D7_1333300
1	MPM-MPMP1045-Classical COPII-mediated vesicular transport	Protein Trafficking	3709	329	26	5	over	0.0233067	0.0837863	PF3D7_1020900,PF3D7_1230700,PF3D7_1361100,PF3D7_1314500,PF3D7_1333300
1	MPM-MPMP1120-Interactome of the Ser-Thr Protein Phosphatase type 1		3709	329	94	19	over	0.000152294	0.000880019	PF3D7_1020900,PF3D7_1008000,PF3D7_0310400,PF3D7_0608800,PF3D7_1222300,PF3D7_1462800,PF3D7_0919900,PF3D7_0520900,PF3D7_1108600,PF3D7_1228600,PF3D7_0813200,PF3D7_0220000,PF3D7_1121600,PF3D7_0917900,PF3D7_1105100,PF3D7_1343000,PF3D7_0503000,PF3D7_1457000,PF3D7_1466300
1	MPM-MPMP1169-Myristoylated proteins		3709	329	44	11	over	0.000301351	0.00220001	PF3D7_1020900,PF3D7_1222700,PF3D7_1460600,PF3D7_1204300,PF3D7_0816200,PF3D7_0414900,PF3D7_1138500,PF3D7_1365900,PF3D7_0810300,PF3D7_1457000,PF3D7_1237700
1	MPM-MPMP1089-Genes coding for components of the proteasome degradation machinery and their timed transcription	Proteasomal Protein Degradation	3709	329	103	22	over	2.13704e-05	0.000166544	PF3D7_1033900,PF3D7_1225800,PF3D7_1028200,PF3D7_1368100,PF3D7_0627300,PF3D7_0316900,PF3D7_1414000,PF3D7_1353900,PF3D7_0413600,PF3D7_1119400,PF3D7_1117100,PF3D7_0915100,PF3D7_1365900,PF3D7_0104300,PF3D7_1345500,PF3D7_1338100,PF3D7_1243700,PF3D7_1211800,PF3D7_0807500,PF3D7_1328100,PF3D7_0807800,PF3D7_1466300
1	MPM-MPMP1096-Genes encoding ubiquitin-related reactions	Proteasomal Protein Degradation	3709	329	103	17	over	0.0035651	0.0115364	PF3D7_1033900,PF3D7_1225800,PF3D7_1028200,PF3D7_1422500,PF3D7_1368100,PF3D7_0627300,PF3D7_0316900,PF3D7_1119400,PF3D7_1117100,PF3D7_0915100,PF3D7_1365900,PF3D7_0104300,PF3D7_1345500,PF3D7_0415800,PF3D7_1208800,PF3D7_1243700,PF3D7_1211800
1	MPM-MPMP1222-Proteasome-mediated proteolysis of ubiquinated proteins	Proteasomal Protein Degradation	3709	329	88	21	over	4.65046e-06	5.16665e-05	PF3D7_1033900,PF3D7_1225800,PF3D7_1368100,PF3D7_0627300,PF3D7_0316900,PF3D7_1414000,PF3D7_1353900,PF3D7_0413600,PF3D7_1119400,PF3D7_1117100,PF3D7_0915100,PF3D7_0818500,PF3D7_1365900,PF3D7_0104300,PF3D7_1345500,PF3D7_1338100,PF3D7_1243700,PF3D7_1211800,PF3D7_0807500,PF3D7_0807800,PF3D7_1466300
1	MPM-MPMP1221-Proteasome-mediated degradation of non-native ER proteins	Proteasomal Protein Degradation	3709	329	42	7	over	0.0286335	0.0829165	PF3D7_1033900,PF3D7_1225800,PF3D7_1422500,PF3D7_1134100,PF3D7_0917900,PF3D7_0619400,PF3D7_1211800
1	MPM-MPMP1159-Models for ubiquitin -Ub- chain amputation and trimming in regulating proteasomal degradation	Proteasomal Protein Degradation	3709	329	16	7	over	2.40561e-05	0.00064672	PF3D7_1368100,PF3D7_1414000,PF3D7_0413600,PF3D7_1117100,PF3D7_0818500,PF3D7_1365900,PF3D7_0807800
1	MPM-MPMP1143-Mechanism of ubiquitin transfer	Proteasomal Protein Degradation	3709	329	16	5	over	0.00172952	0.0147993	PF3D7_1225800,PF3D7_0627300,PF3D7_1365900,PF3D7_1345500,PF3D7_1243700
1	MPM-MPMP1157-Model of the Ube2w-CHIP-Ataxin-3 Ubiquitination Cycle	Proteasomal Protein Degradation	3709	329	23	6	over	0.00284791	0.0177062	PF3D7_1222300,PF3D7_1117100,PF3D7_1443900,PF3D7_0818500,PF3D7_1365900,PF3D7_0104300
1	MPM-MPMP1316-Translocon of exported proteins -PTEX-	Exported protein	3709	329	11	5	over	0.000146521	0.00323763	PF3D7_1471100,PF3D7_0102200,PF3D7_1116800,PF3D7_1436300,PF3D7_1420700
1	MPM-MPMP1052-Components of exosomes	Exported protein	3709	329	18	9	over	6.06149e-07	4.14471e-05	PF3D7_1471100,PF3D7_1462800,PF3D7_0102200,PF3D7_1116800,PF3D7_0905400,PF3D7_0929400,PF3D7_0619400,PF3D7_0302500,PF3D7_0501600
1	MPM-MPMP1235-Proteins of erythrocyte-derived microvesicles	Exported protein	3709	329	18	9	over	6.06149e-07	4.14471e-05	PF3D7_1471100,PF3D7_1462800,PF3D7_0102200,PF3D7_1116800,PF3D7_0905400,PF3D7_0929400,PF3D7_0619400,PF3D7_0302500,PF3D7_0501600
1	MPM-MPMP1307-Top ranked surface exposed proteins	Exported protein	3709	329	132	26	over	2.26275e-05	0.000155367	PF3D7_1115600,PF3D7_0525800,PF3D7_1406800,PF3D7_0310400,PF3D7_0828800,PF3D7_1141800,PF3D7_1462800,PF3D7_1010700,PF3D7_0506900,PF3D7_1133400,PF3D7_1108600,PF3D7_1116800,PF3D7_1344200,PF3D7_0905400,PF3D7_0929400,PF3D7_1410400,PF3D7_0917900,PF3D7_0922200,PF3D7_1314500,PF3D7_0918000,PF3D7_1116700,PF3D7_0904700,PF3D7_0314000,PF3D7_0501600,PF3D7_1252100,PF3D7_1132800
1	MPM-MPMP1215-Posttranslational translocation in eukaryotes	Protein Folding, Assembly and Trasnport	3709	329	27	5	over	0.0278027	0.0945068	PF3D7_1115600,PF3D7_1134100,PF3D7_1344200,PF3D7_0917900,PF3D7_1457000
1	MPM-MPMP1240-Proteins with ER retention sequences	Protein Folding, Assembly and Trasnport	3709	329	13	7	over	3.05637e-06	0.000189179	PF3D7_1115600,PF3D7_1222300,PF3D7_1010700,PF3D7_1108600,PF3D7_1344200,PF3D7_0917900,PF3D7_1404900
1	MPM-MPMP1107-Hemoglobin digestion	Hemoglobin digestion/ Egrees-Invasion	3709	329	24	6	over	0.0037206	0.0212739	PF3D7_1136900,PF3D7_0507500,PF3D7_0507200,PF3D7_1460100,PF3D7_1116700,PF3D7_1115400
1	MPM-MPMP1022-ATP-dependent chromatin remodeling complexes		3709	329	36	6	over	0.035736	0.103645	PF3D7_1146600,PF3D7_0803500,PF3D7_0407900,PF3D7_1141800,PF3D7_0624600,PF3D7_0509100
1	MPM-MPMP1085-Generation of polyphosphates		3709	329	23	4	over	0.0472637	0.149647	PF3D7_1225800,PF3D7_0525100,PF3D7_0731600,PF3D7_0316300
1	MPM-MPMP1227-Protein kinase G-dependent phosphorylation in schizonts	Invasion-Egress	3709	329	46	15	over	8.60158e-07	2.09728e-05	PF3D7_1251200,PF3D7_0525800,PF3D7_0515700,PF3D7_1222700,PF3D7_0617900,PF3D7_0414900,PF3D7_1342600,PF3D7_0624600,PF3D7_0506900,PF3D7_1138400,PF3D7_0424600,PF3D7_1142500,PF3D7_1105100,PF3D7_1027300,PF3D7_0730300
1	MPM-MPMP1037-cGMP-PKG signalling in egress-invasion	Invasion-Egress	3709	329	11	6	over	9.80304e-06	0.000506889	PF3D7_1251200,PF3D7_0525800,PF3D7_0515700,PF3D7_1222700,PF3D7_1337800,PF3D7_1342600
1	MPM-MPMP1010-Activation of the calcium and cAMP signaling pathway by melatonin		3709	329	16	3	over	0.0470006	0.170867	PF3D7_0818200,PF3D7_0934800,PF3D7_1131100
1	MPM-MPMP1238-Proteins targeted by the thioredoxin superfamily enzymes		3709	329	44	10	over	0.00119387	0.00657364	PF3D7_0818200,PF3D7_1438900,PF3D7_0802200,PF3D7_1405600,PF3D7_0608800,PF3D7_1462800,PF3D7_0520900,PF3D7_0917900,PF3D7_1343000,PF3D7_0922200
1	MPM-MPMP1154-Model for translesion DNA synthesis		3709	329	14	3	over	0.0297492	0.129391	PF3D7_0904800,PF3D7_1365900,PF3D7_0104300
1	MPM-MPMP1237-Proteins predicted to be involved in cell cycle regulatory network		3709	329	54	11	over	0.00217505	0.00972174	PF3D7_0917900,PF3D7_1105100,PF3D7_0420300,PF3D7_0527000,PF3D7_0907400,PF3D7_1143100,PF3D7_1239200,PF3D7_1309400,PF3D7_0509100,PF3D7_0730300,PF3D7_0705300
1	MPM-MPMP1008-Actin and filaments		3709	329	30	5	over	0.0445892	0.130561	PF3D7_1251200,PF3D7_1455100,PF3D7_0503400,PF3D7_0530900,PF3D7_1337800
1	MPM-MPMP1133-Location of lipid raft-associated proteins		3709	329	41	20	over	2.2703e-12	1.4387e-09	PF3D7_1335300,PF3D7_0731500,PF3D7_0206900,PF3D7_1471100,PF3D7_0831600,PF3D7_1133400,PF3D7_0424200,PF3D7_1035400,PF3D7_1121600,PF3D7_0905400,PF3D7_0207600,PF3D7_0929400,PF3D7_1410400,PF3D7_1436300,PF3D7_1335400,PF3D7_0918000,PF3D7_0501600,PF3D7_1420700,PF3D7_1252100,PF3D7_0501500
1	MPM-MPMP1297-The ATG autophagic pathway		3709	329	19	4	over	0.0218609	0.0905117	PF3D7_1337800,PF3D7_1335400,PF3D7_0216700,PF3D7_1239800
1	MPM-MPMP1234-Proteins of detergent-resistant membranes		3709	329	135	33	over	8.29924e-09	2.12317e-07	PF3D7_1342000,PF3D7_1430900,PF3D7_1222700,PF3D7_0731500,PF3D7_1471100,PF3D7_0102200,PF3D7_1116800,PF3D7_1121600,PF3D7_0905400,PF3D7_0207600,PF3D7_0929400,PF3D7_0424600,PF3D7_1142500,PF3D7_1410400,PF3D7_1436300,PF3D7_0917900,PF3D7_0806800,PF3D7_1365900,PF3D7_0918000,PF3D7_0302500,PF3D7_0501600,PF3D7_0402100,PF3D7_1211800,PF3D7_1420700,PF3D7_1149200,PF3D7_1237700,PF3D7_1252100,PF3D7_0501500,PF3D7_1…
1	MPM-MPMP1191-Peptidases and proteases		3709	329	130	22	over	0.000861166	0.0032793	PF3D7_1368100,PF3D7_0301300,PF3D7_1353900,PF3D7_1136900,PF3D7_0507500,PF3D7_0507200,PF3D7_0506900,PF3D7_1117100,PF3D7_1118300,PF3D7_0207600,PF3D7_0207700,PF3D7_0104300,PF3D7_0808200,PF3D7_1116700,PF3D7_0208000,PF3D7_0919200,PF3D7_1411200,PF3D7_0103400,PF3D7_1457000,PF3D7_1115400,PF3D7_0807500,PF3D7_1328100
1	MPM-MPMP1233-Proteins involved in steps during passage through prophase		3709	329	23	7	over	0.000525639	0.00487783	PF3D7_1423300,PF3D7_1466100,PF3D7_1433500,PF3D7_0414000,PF3D7_1318400,PF3D7_1403100,PF3D7_0509100
1	MPM-MPMP1229-Protein phosphorylation		3709	329	97	13	over	0.0450656	0.0945121	PF3D7_1455100,PF3D7_1423300,PF3D7_1466100,PF3D7_1138500,PF3D7_1018200,PF3D7_0623800,PF3D7_0214600,PF3D7_0810300,PF3D7_1135100,PF3D7_1331600,PF3D7_1441300,PF3D7_0320000,PF3D7_1427900
1	MPM-MPMP1200-Phosphatome - Phosphatases of Plasmodium falciparum		3709	329	70	11	over	0.0185915	0.0501772	PF3D7_1455100,PF3D7_1423300,PF3D7_1466100,PF3D7_1138500,PF3D7_1018200,PF3D7_0705500,PF3D7_0810300,PF3D7_0305600,PF3D7_0918000,PF3D7_1135100,PF3D7_1331600
1	MPM-MPMP1291-Subcellular location of adaptor proteins		3709	329	25	6	over	0.00478252	0.025299	PF3D7_1455500,PF3D7_1311400,PF3D7_1440700,PF3D7_0606700,PF3D7_1145100,PF3D7_1429800
1	MPM-MPMP1061-DNA binding proteins with AP2 domain-s-		3709	329	20	7	over	0.000171293	0.00228992	PF3D7_1456000,PF3D7_0802100,PF3D7_0604100,PF3D7_0420300,PF3D7_1143100,PF3D7_1239200,PF3D7_0730300
